# Supplementary material
Source: PubMed Central journal article supplement (PMC4120811)
Supplement: Supp_Figure1.pdf [file Supp_Figure1.pdf]

## Supplementary Data

|               | II<br>Sample 1 | II<br>Sample 2 | II<br>Sample 3 | OI<br>Sample 1 | OI<br>Sample 2 | OI<br>Sample 3 |
|---------------|----------------|----------------|----------------|----------------|----------------|----------------|
| II - Sample 1 | 1,0            | 0,058          | 0,255          | -0,342         | -0,39          | -0,408         |
| II - Sample 2 | 0,058          | 1,0            | 0,336          | -0,573         | 0,042          | -0,33          |
| II - Sample 3 | 0,255          | 0,336          | 1,0            | -0,67          | -0,2           | -0,179         |
| OI - Sample 1 | -0,342         | -0,573         | -0,67          | 1,0            | -0,225         | -0,056         |
| OI - Sample 2 | -0,39          | 0,042          | -0,2           | -0,225         | 1,0            | 0,065          |
| OI - Sample 3 | -0,408         | -0,33          | -0,179         | -0,056         | 0,065          | 1,0            |

**SUPPLEMENTARY FIG. S1.** Correlation plot of the microarray data of the two sample groups with three biological replicates each shows that the three biological replicates of each sample group [intermediate interzone (II) and outer interzone (OI)] are more similar to each other than to the other group.
