# Supplementary material
Source: PubMed Central journal article supplement (PMC4120811)
Supplement: Supp_Figure2.pdf [file Supp_Figure2.pdf]

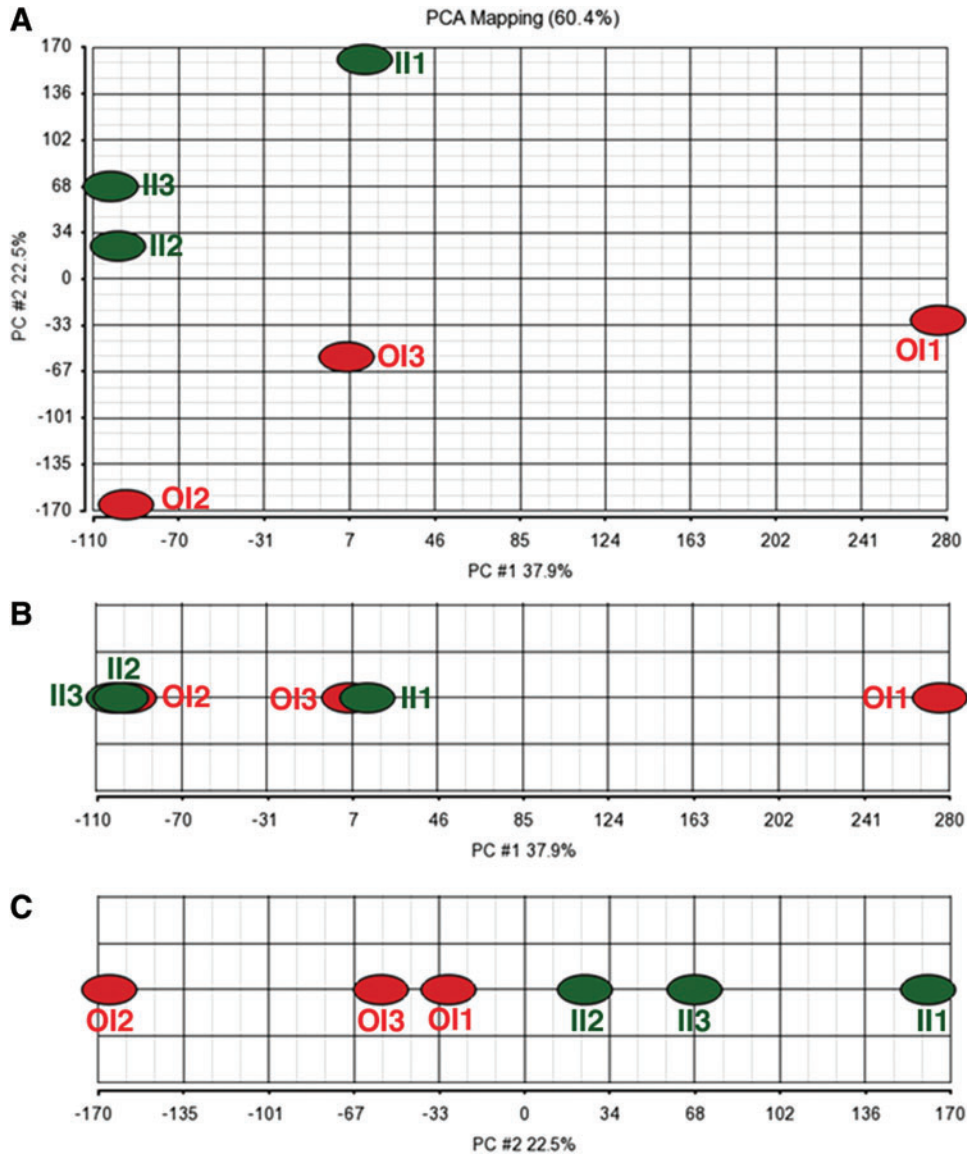

**SUPPLEMENTARY FIG. S2.** Principal component analysis groups the three biological replicates of the intermediate interzone closer to each other than to the corresponding biological replicates of the outer interzone, thus confirming correct layer selection. The numbers 1–3 indicate the embryo the tissue was harvested from (ie, II1 and OI1 were harvested from the same individual, embryo 1: Wanek stage 12, embryos 2 and 3: Wanek stage 11). **(A)** Two-dimensional principal component analysis of the three II (*green*) and the three OI (*red*) samples used in this study. These two principal components explain 60.4% of the variance between the samples. This plot shows that the three biological replicates of each sample group are more similar to each other than to the other group. The sample on the *right* of both the intermediate and the outer interzones belongs to the same embryo, which in contrast to the other two biological replicates (Wanek stage 11) were harvested from a limb of Wanek stage 12. **(B)** Plot of principal component 1. This principal component explains 37.9% of the variance between the samples. **(C)** Plot of principal component 2. This principal component explains 22.5% of the variance between the samples.
